# 1 Soundscapes predict species occurrence in tropical forests

2 Sarab S. Sethi\*<sup>1,2,3</sup>, Robert M. Ewers<sup>1</sup>, Nick S. Jones<sup>2</sup>, Jani Sleutel<sup>4</sup>, Adi Shabrani<sup>5</sup>, Nursyamin Zulkifli<sup>4</sup>,  
3 Lorenzo Picinali<sup>3</sup>

4 1) Department of Life Sciences, Imperial College London, Ascot, SL5 7PY, UK

5 2) Department of Mathematics, Imperial College London, London, SW7 2AZ, UK

6 3) Dyson School of Design Engineering, Imperial College London, London, SW7 2AZ, UK

7 4) Southeast Asia Rainforest Research Partnership, Lahad Datu, 91112, Malaysia

8 5) WWF-Malaysia, Sabah Office, Kota Kinabalu, 88000, Malaysia

9 \* [s.sethi16@imperial.ac.uk](mailto:s.sethi16@imperial.ac.uk)

## 10 Abstract

- 11 1. Accurate occurrence data is necessary for the conservation of keystone or endangered species,  
12 but acquiring it is usually slow, laborious, and costly. Automated acoustic monitoring offers a  
13 scalable alternative to manual surveys, but identifying species vocalisations requires large  
14 manually annotated training datasets, and is not always possible (e.g., for silent species). A new,  
15 intermediate approach is needed that rapidly predicts species occurrence without requiring  
16 extensive labelled data.
- 17 2. We investigated whether local soundscapes could be used to infer the presence of 32 avifaunal  
18 and seven herpetofaunal species across a tropical forest degradation gradient in Sabah, Malaysia.  
19 We developed a machine-learning based approach to characterise species indicative  
20 soundscapes, training our models on a coarsely labelled manual point-count dataset.
- 21 3. Soundscapes successfully predicted the occurrence of 34 out of the 39 species across the two  
22 taxonomic groups, with area under the curve (AUC) metrics of up to 0.87 (Bold-striped Tit-  
23 babbler *Macronus bornensis*). The highest accuracies were achieved for common species with  
24 strong temporal occurrence patterns.
- 25 4. Soundscapes were a better predictor of species occurrence than above-ground biomass – a metric  
26 often used to quantify habitat quality across forest degradation gradients.

27 5. *Synthesis and applications*: Our results demonstrate that soundscapes can be used to efficiently  
28 predict the occurrence of a wide variety of species. This provides a new direction for audio data  
29 to deliver large-scale, accurate assessments of habitat suitability using cheap and easily obtained  
30 field datasets.

31

## 32 **Introduction**

33 Ecosystems are being subjected to increasing external pressures from land-use change and global  
34 warming (Lambin and Meyfroidt, 2011; Walther et al., 2002). These pressures have resulted in global  
35 biodiversity declines, as the natural habitats required to support many species shrink and disappear  
36 (Newbold et al., 2015). Efforts to slow this decline often aim to protect areas of high conservation value  
37 that may support populations of endangered or keystone species (Mills et al., 1993). This leads to the  
38 key question; how can we identify such locations rapidly, accurately, and on a large scale?

39 An established solution is to carry out manual surveys of the region of interest (Brown et al., 2013).  
40 Common approaches include actively searching for species of interest, deploying traps to capture them,  
41 or looking for features that may indicate their presence (e.g., nests). However, manual surveys are  
42 expensive, labour intensive, and do not scale well temporally or spatially (Gijzen, 2013). In contrast,  
43 automated acoustic monitoring has shown promise as a route to gaining scalable insight into ecological  
44 systems (Gibb et al., 2019). Audio data can be recorded and analysed inexpensively, in real-time, and  
45 over extended durations, making it an increasingly powerful tool for ecologists and conservationists  
46 (Hill et al., 2018; Sethi et al., 2018; Sethi et al., 2020a).

47 Species occurrence data can be extracted from audio recordings automatically by detecting  
48 vocalisations. Using a large training dataset of annotated examples, a machine learning model can learn  
49 to identify calls made by a target species (Clink et al., 2019; Stowell et al., 2016; Wrege et al., 2017).  
50 This approach, however, relies upon three key assumptions; (i) the species has a unique vocalisation,

51 (ii) the species is active and audible during the recording, and (iii) there exists a large labelled dataset  
52 of the species' vocalisations (or the resources to collate such training data from scratch). These barriers  
53 are particularly difficult to overcome when searching for rare or endangered species in highly biodiverse  
54 and noisy environments such as tropical forests (Gibb et al., 2019; Stowell et al., 2018), or for species  
55 that are largely silent.

56 Analysing soundscapes in their entirety provides an alternate route to the automated analysis of eco-  
57 acoustic data (Pijanowski et al., 2011). In this approach, features of the audio signal are used to directly  
58 infer habitat quality, without the need for species specific training data (Pieretti et al., 2011; Sethi et al.,  
59 2020b; Sueur et al., 2008). Whilst soundscape features have been shown to correlate with high-level  
60 metrics of biodiversity, they are not normally used to provide direct evidence for how suitable a habitat  
61 is for a given species.

62 In this study we demonstrate that an environment's soundscape can in fact be used as a powerful  
63 indicator of species occurrence. Rather than focussing on species-specific vocalisations, our model  
64 learned acoustic features which indicated species presence using only coarsely-labelled point count data  
65 from across a gradient of tropical forest degradation in Sabah, Malaysia. We were able to predict  
66 occurrence accurately for a number of avifaunal and herpetofaunal species without the need for large,  
67 precisely annotated training datasets. Additionally, we showed that soundscapes are a more accurate  
68 predictor of species occurrence than above-ground biomass, a metric often used to quantify habitat  
69 quality across forest degradation gradients (Pfeifer et al., 2015). Our findings indicate a promising new  
70 route for audio data to be used for the conservation of species on a large scale, and across a wide range  
71 of taxa, without many of the limitations of vocalisation detection-based approaches.

72

## 73 **Materials and methods**

### 74 *Study location and estimates of habitat quality*

75 This work was undertaken at the Stability of Altered Forest Ecosystems (SAFE) Project in Sabah,  
76 Malaysia (Ewers et al., 2011) between March 2018 and February 2020. We surveyed eleven sites across  
77 a land-use intensity gradient: two sites in oil palm plantations, two sites in salvage logged forest (last  
78 logged in the early 2010's), five sites in selectively twice-logged forest (logged in the 1970's and early  
79 2000's), and two sites in forest inside a protected area (where small amounts of illegal logging activity  
80 had occurred).

81 From 2012 to 2013, Pfeifer and colleagues (Pfeifer et al., 2015) conducted ground surveys of over 100  
82 vegetation plots (25 x 25 m) across the SAFE project landscape to quantify above ground biomass  
83 (AGB). We averaged AGB from all surveyed plots within 1 km of each of our sampling sites (mean  
84 plots per site = 8.5, range = 2-16), for use as a quantitative measure of habitat quality.

85

#### 86 *Avifaunal and herpetofaunal point counts*

87 Across the 11 sampling sites, we carried out 790 avifaunal and 771 herpetofaunal point counts (of which  
88 483 were undertaken simultaneously). Each point count lasted 20 minutes and surveys were distributed  
89 evenly throughout the 24 hours of the day, giving approximately three replicates per site per hour for  
90 both avifaunal and herpetofaunal point counts.

91 During point counts, we recorded all visual or aural encounters of avifaunal or herpetofaunal species  
92 within a 10 m radius of the sampling site. Species were cross-referenced with the Global Biodiversity  
93 Information Facility (GBIF) backbone taxonomy to validate taxonomic classifications (GBIF  
94 Secretariat, 2020).

95 Occurrence data (presence/absence) was thus acquired for 175 avifaunal and 53 herpetofaunal species.  
96 Species present in fewer than 50 point counts were removed from the dataset. For those species  
97 classified as vulnerable or critically endangered by the IUCN Red List (Baillie et al., 2004), a reduced  
98 threshold of 15 occurrences was used. In total this gave us a set of 32 avifaunal and seven herpetofaunal

99 species (Supp. Table S1). Five of the 32 avifaunal species were listed as vulnerable or critically  
100 endangered, but none of the seven herpetofaunal species were.

101

### 102 ***Audio data and acoustic feature extraction***

103 During each point count a simultaneous 20-minute audio recording was made using a Tascam DR-05  
104 recorder mounted at chest height. Raw audio data was recorded to a single channel at 44.1 kHz in the  
105 WAV format.

106 We calculated learned acoustic features of the audio using a pretrained convolutional neural network  
107 (CNN), “VGGish”, developed by Hershey et. al (Hershey et al., 2017). The CNN was trained to perform  
108 a general-purpose audio classification task using an extremely large annotated dataset (Gemmeke et al.,  
109 2017), resulting in a general 128-dimensional acoustic feature embedding. Prior work has shown that  
110 embedding eco-acoustic data using this approach allows multi-scale monitoring of ecosystems and  
111 efficient characterisation of soundscapes (Sethi et al., 2020b).

112 The VGGish CNN takes a 16 kHz log-scaled Mel-frequency spectrogram as an input (96 temporal  
113 frames, 64 frequency bands) providing one feature vector per 0.96 s of audio. Since our raw audio data  
114 was recorded at a higher sample rate, we pre-processed it by down-sampling to 16 kHz (using a Kaiser  
115 window filter to avoid aliasing). During the analysis we also investigated how averaging consecutive  
116 acoustic features over the following longer time periods affected our results: 1.92, 2.88, 3.84, 4.80, 5.76,  
117 6.72, 7.68, 8.64, 9.60, 29.76, 59.52 and 299.52 s.

118

### 119 ***Predictions of species occurrence***

120 For each species we split point counts into two groups; one where the target species was present (*pres*)  
121 and the other where it was absent (*abs*). We fit a Dirichlet-process Gaussian mixture model (DP-GMM)

122 to acoustic features from each group to obtain the probability density functions  $p_{pres}$  and  $p_{abs}$  (Blei and  
123 Jordan, 2006), using an upper bound of 500 components and diagonal covariance matrices. Other  
124 hyperparameters were left as default using the scikit-learn *BayesianGaussianMixture* implementation.  
125 For each 20-minute audio recording, we first split the audio into  $N$  non-overlapping 0.96 s segments.  
126 We defined the set  $S$  of acoustic feature vectors derived from each segment as,  $S = \{X_1, X_1, \dots, X_N\}$ . When  
127 using features on longer timescales than 0.96 s, we averaged consecutive members of  $S$  using non-  
128 overlapping windows. For each feature  $X_i$  we calculated a likelihood ratio,  $L_i = \log(p_{pres}(X_i)) -$   
129  $\log(p_{abs}(X_i))$ , allowing us to define a new set,  $S_L = \{L_1, L_2, \dots, L_N\}$ . To obtain an overall classification  
130 confidence indicating the probability of the species being present in the full 20-minute recording, we  
131 looked at four properties of  $S_L$ ; (i)  $\lambda_1 = \max(S_L)$ , (ii)  $\lambda_2 = \min(S_L)$ , (iii)  $\lambda_3 = \text{mean}(S_L)$ , and (iv)  $\lambda_4 = P_{\%}($   
132  $S_L)$  (for percentiles 10, 20, 30, 40, 50, 60, 70, 80, and 90). We found that the 60<sup>th</sup> percentile metric,  $\lambda_4$   
133  $= P_{60}(S_L)$ , provided the most accurate predictions, and therefore report results only for this definition of  
134 classification confidence (Supp. Fig. S2). Henceforth  $\lambda$  will be used to refer to  $\lambda_4$ .

135 To assess the extent to which soundscapes can predict species occurrence we performed an eleven-fold  
136 cross-validation classification task for each species. In each fold, data from ten sites were used as a  
137 training set (to fit  $p_{pres}$  and  $p_{abs}$ ), and data from the remaining eleventh site was used as a test set to  
138 assess the model's accuracy. In this way we ensured that we did not report artificially high accuracies  
139 by overfitting to site specific soundscapes, but learned generalisable acoustic characteristics that  
140 indicated species presence in previously unseen locations. We measured the ability of  $\lambda$  to classify a  
141 species as present in a point count using the area under the receiver operating characteristic curve (AUC)  
142 metric. Mean AUC was calculated for each species across all 11 folds.

143 For each species we generated null distributions of AUC values to calculate statistical significance of  
144 predictions. We used acoustic features at the 2.88s timescale, as these features maximised mean AUC  
145 across all species (Supp. Fig. S2). We randomly shuffled classification confidence scores ( $\lambda$ ) 100 times

146 within each of the 11 folds, and measured AUC using the unshuffled occurrence labels. 100 null mean  
147 AUC values were obtained by averaging across the 11 folds, and we used a threshold of  $p \leq 0.05$  to  
148 determine statistical significance.

149 We performed a similar eleven-fold cross-validation classification task using above-ground biomass  
150 data, to compare the predictive power of the two data sources. In each fold, we identified the site in the  
151 training set with AGB most similar to the site in the test set. Then, to predict species occurrence in each  
152 20-minute point count, we used the mean species occurrence from point counts at the same time of day  
153 from the previously identified similar site.

154

### 155 *Analysis of performance across species*

156 To quantify how temporally structured occurrence patterns were for each species, we formulated a  
157 contingency table with species occurrence as one variable and hour of day as the other (using the ground  
158 truth point count data). On this contingency table we calculated a  $\chi^2$  statistic. We then calculated  
159 Pearson's correlation coefficient,  $\rho$ , between the  $\chi^2$  statistic and AUC across all 39 species to test  
160 whether accuracy of our predictions was correlated with how temporally structured each species'  
161 occurrence patterns were. We also calculated Pearson's correlation coefficient between the total number  
162 of point counts in which each species was found and AUC to investigate whether rarity of species had  
163 an effect on accuracy of predictions. In both cases p-values were obtained analytically.

164

## 165 **Results**

### 166 *Soundscapes are highly indicative of species occurrence*

167 We were able to predict species occurrence from soundscape recordings for four of the seven non-  
168 threatened herpetofaunal species, all 27 non-threatened avifaunal species, and three of the five

169 threatened avifaunal species ( $p \leq 0.05$ , Fig. 1a). Mean AUC across all species was highest using features  
170 on the 2.88 s timescale (Supp. Fig. S2), although the most accurate classifications for a single species  
171 was found for the Bold-striped Tit-babbler *Macronus bornensis* when using 0.96 s per feature (0.87  
172 AUC). Variation in AUC between species was larger than the variation for a given species across  
173 different timescales of features. Even with features averaged over almost five minutes, we were able to  
174 predict species occurrence from soundscapes with AUCs of up to 0.82 (Sooty-capped Babbler  
175 *Malacopteron affine*). Spectrograms (Supp. Fig. S3) confirm the intuition that we did not learn to  
176 identify species vocalisations, but rather the model learned indicative characteristics of the soundscape  
177 that played out over longer timescales than any single species call. From herein we will only consider  
178 results using acoustic features at the optimal 2.88 s timescale.

179 AUC was correlated with total number of encounters of the species across all point counts (Pearson  
180 correlation;  $\rho = 0.31$ ,  $p = 0.05$ ). This explains the lower performance for the five rarer Red List threatened  
181 avifaunal species compared to the other 27 species (T-test on AUCs;  $p < 0.001$ ). Nevertheless,  
182 occurrence was still predicted with accuracies better than chance ( $p \leq 0.05$ ) for three threatened avifaunal  
183 species; the Black Hornbill *Anthracoceros malayanus* (0.69 AUC,  $n = 15$ ), the Rhinoceros Hornbill  
184 *Buceros rhinoceros* (0.69 AUC,  $n = 34$ ) and the Short-toed Coucal *Centropus rectunguis* (0.75 AUC,  $n$   
185  $= 23$ ).

186 We also found that higher AUCs were attained when species were consistently encountered at the same  
187 hours of the day (Fig. 1b, Pearson correlation;  $\rho = 0.64$ ,  $p < 0.001$ ). Non-threatened avifaunal species had  
188 more temporally structured occurrence patterns than non-threatened herpetofaunal species (T-test on  $\chi^2$   
189 statistics;  $p = 0.04$ ), explaining the difference in AUCs between the taxonomic groups (T-test on AUCs;  
190  $p < 0.001$ ). Nevertheless, AUCs for four of the seven herpetofaunal species were still better than would  
191 be expected by chance, and reached up to 0.86 for the Tree Hole Frog *Metaphrynella sundana*.



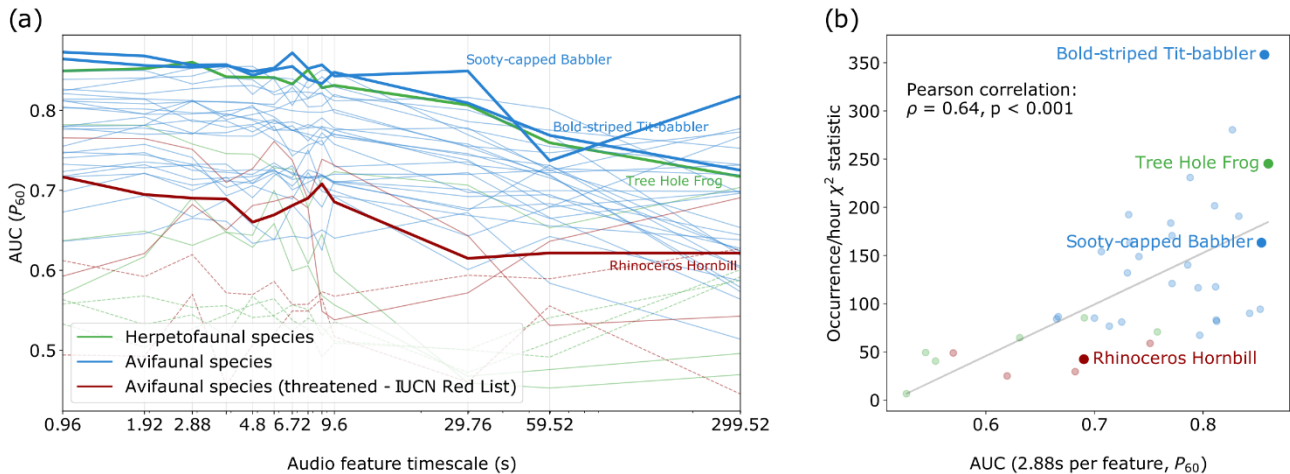

192 **Figure 1: Soundscapes features reliably predict species occurrence.** We measured how predictive  
 193 soundscapes were of species presence across 27 non-threatened avifaunal species (blue), five  
 194 threatened avifaunal species (brown), and seven non-threatened herpetofaunal species (green). (a) We  
 195 found soundscapes features across a wide range of timescales were predictive of species occurrence  
 196 for 34 species (dotted lines indicate species for which  $p > 0.05$ ). (b) The accuracy of occurrence  
 197 predictions was significantly correlated with a  $\chi^2$  statistic measuring how correlated hour of day was  
 198 with species occurrence ( $p < 0.001$ ). In both panels we highlight results from four indicative taxa chosen  
 199 to reflect the variety of species included in this study.

200

201 There was a close relationship between predicted occurrence from soundscape data and the pattern of  
 202 true occurrence across habitat types and time of day (Fig. 2; Supp. Fig. S4 shows similar visualisations  
 203 for all 39 species). We found that soundscape classification confidence was higher at the true times at  
 204 which a species would be present, whether the species was diurnal (Fig. 2a, Yellow-vented Bulbul  
 205 *Pycnonotus goiavier*), nocturnal (Fig. 2c, Tree Hole Frog), or found only during very specific hours  
 206 (Fig. 2b Sooty-capped Babbler). We also found that soundscape predictions reflected true observations  
 207 of species habitat niches. For example, the Sooty-capped Babbler (Fig. 2b) and Tree Hole Frog (Fig.  
 208 2c) were commonly found in forest habitats – either logged or inside protected areas – whereas the  
 209 Yellow-vented Bulbul was found more often in heavily disturbed habitats (salvage logged forest and oil  
 210 palm). In all three cases, classification confidence derived from soundscape data reflected these habitat  
 211 partitioning patterns.

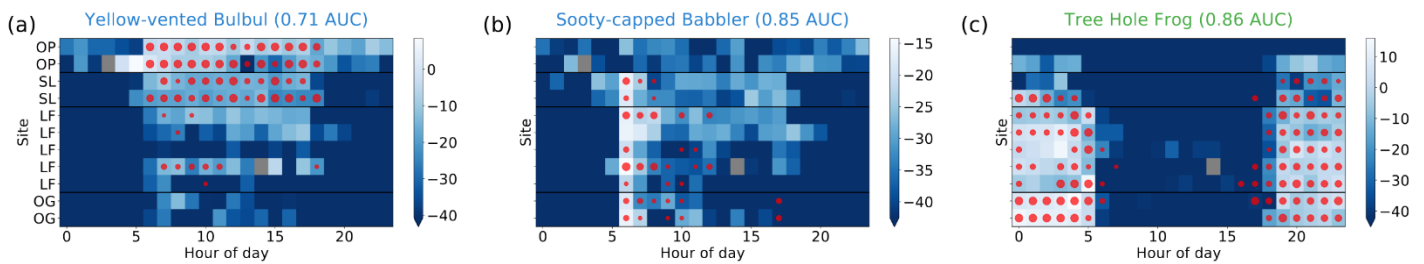

212 **Figure 2: Soundscapes predict occurrence for species with varying habitat and temporal niches.**  
213 *Median classification scores,  $\lambda$ , from dark blue (low) to white (high) are shown for occurrence*  
214 *predictions from soundscapes for three species: (a) Yellow-vented Bulbul, (b) Sooty-capped Babbler,*  
215 *and (c) Tree Hole Frog. Overlaid in red is true occurrence data, where circle sizes indicate how often*  
216 *the species was found at that site and hour during the manual point counts. Sites are ordered by above-*  
217 *ground biomass with low-quality habitats at the top and high-quality habitats at the bottom. (Supp. Fig.*  
218 *S3 provides the same visualisation for all 39 species).*

219

### 220 **Soundscapes predict occurrence more accurately than above-ground biomass**

221 We found that soundscape features predicted species occurrence more accurately than a comparison  
222 model based on above-ground biomass (AGB) data, a metric often used as a proxy for tropical forest  
223 habitat quality (Fig. 3, paired T-test on AUCs;  $p < 0.001$ ). The soundscape-based model produced  
224 increased AUCs for 31 of the 39 species surveyed, including for all five threatened avifaunal species.  
225 Mean accuracy of occurrence predictions for the non-threatened avifaunal group was increased by 0.08  
226 AUC, for the threatened avifaunal group by 0.06 AUC, and for the non-threatened herpetofaunal group  
227 by 0.03 AUC. This followed the trends noted earlier, as groups of species which were common, or  
228 exhibited strong temporal occurrence patterns benefited the most from the soundscape based approach.  
229 Per species there was a mean percentage increase in AUC of 10 % across all 39 species surveyed.

230

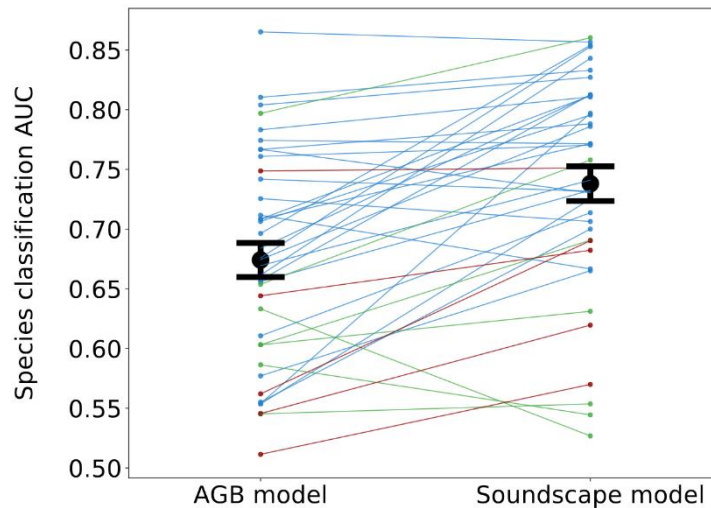

231 **Figure 3: Soundscape features are a better indicator of species occurrence than above-ground**  
232 **biomass (AGB).** We compared occurrence predictions using soundscapes to a comparison model using  
233 AGB data. Lines connect AUC metrics for the same species, with threatened avifaunal species in brown,  
234 non-threatened avifaunal species in blue, and non-threatened herpetofaunal species in green. In black  
235 is the mean and standard error for AUC across all 39 species for each model.

236

## 237 Discussion

238 We investigated whether soundscapes could indicate the occurrence patterns of 39 species across two  
239 taxonomic groups. Our results demonstrate this is indeed feasible, and that the most accurate indications  
240 can be obtained for species for which we have the most data (the most common species) and those with  
241 strong temporal occurrence patterns. This meant that our approach is less suited to the monitoring of  
242 endangered species, although we were able to successfully model occurrence for three species based on  
243 very sparse occurrence data of just 15, 23, and 34 observations across 790 point counts. Nevertheless,  
244 species listed as vulnerable or endangered by the IUCN Red List are not the only ones of conservation  
245 interest. Species which are particularly good indicators of habitat quality, those that have a  
246 disproportionate ecological impact on their environment, or those that fulfil important economic  
247 functions are often referred to as “keystone species” (Mills et al., 1993). Whilst these species are  
248 sometimes also endangered, this is not always the case. For example, within the “non-threatened”  
249 species, we had the Rough Guardian Frog *Limnonectes finchi*, a species only ever found close to suitable

250 water sources (Inger and Voris, 1988). We also had the White Crowned Shama *Copsychus stricklandii*  
251 which due to their unique singing ability is threatened by a high rate of unsustainable trade in South  
252 East Asia (Leupen et al., 2018). We were able to predict occurrence for both of these species accurately.  
253 Using soundscapes to assess habitat suitability for species like these would therefore be a promising  
254 route to take, with valuable conservation data to be gained.

255 We found that our model was most accurate when using short timescale acoustic features. This may  
256 simply be a matter of resolution – with longer timescale features the details of how soundscapes move  
257 between different modes are lost. The average of shorter features over these long time periods will  
258 therefore only provide a crude overview of the overall soundscape, leading to less accurate predictions  
259 of occurrence. Nonetheless, there was still significant predictive information contained within long  
260 timescale features, indicating that a coarse acoustic overview is often all that is required.

261 Our model learned to identify soundscape features that were uniquely found when the species of interest  
262 was present. In this study, we found that this did not correspond to species vocalisations, but sounds  
263 typical to the habitat type, or time of day that the species was likely to be found. This was probably due  
264 to the low number of positive samples we had for each species, together with the high overall temporal  
265 and spatial variability of soundscapes across all of our audio recordings. Whilst all species surveyed in  
266 this study were vocal, foregoing a reliance on vocalisations means that our approach can be used to  
267 explicitly predict the occurrence of completely silent species. Equally tantalisingly, there is a possibility  
268 that with a less heterogenous, larger dataset a similar approach to ours may enable identification of  
269 species vocalisations in an unsupervised manner. This would occur if the predominant distinguishing  
270 acoustic features between present and absent samples was the sound of the species vocalising.  
271 Automatically extracting vocalisations from passive recordings *in situ* may even allow us to discover  
272 calls and behaviours that cannot be reproduced with the same species in a more controlled environment.

273 Other types of data, beyond audio, can be used to predict species occurrence at a given place and time.  
274 AGB is a habitat quality indicator used for many species across tropical forest degradation gradients,  
275 and it has been used extensively at the field site we surveyed (e.g., Brant et al., 2016; Luke et al., 2017;  
276 Riutta et al., 2018). In this study, however, we showed that soundscapes were in fact better predictors  
277 of species occurrence for 31 of the 39 species surveyed. Furthermore, manual field surveys to collect  
278 AGB data are cumbersome (Pfeifer et al., 2015), and when data from planes or satellites are used the  
279 costs can be prohibitively high (Lefsky et al., 2002; Popescu et al., 2011). By contrast, our audio  
280 recording protocol only involved using an inexpensive handheld recorder deployed to gather a 24 hour  
281 acoustic record per site. Recordings of this type could be made rapidly from a large number of sites,  
282 providing wide coverage with minimal capital outlay.

283 The link between habitat suitability and species occurrence data is clear – species are more likely to be  
284 found in habitats that are able to sustainably support their needs (Hirzel et al., 2006). Thus, by showing  
285 that occurrence for a wide range of species can be accurately predicted by soundscapes, this opens up a  
286 new avenue for assessing habitat suitability from audio data. One use-case may be in assisting the  
287 identification of areas of high conservation value within agricultural landscapes, as required by  
288 certification agencies such as the Roundtable for Sustainable Palm Oil (Brown et al., 2013).  
289 Additionally, as collaborative eco-acoustic datasets continue grow (Baker et al., 2015), we may be able  
290 to harness soundscape data to produce large-scale habitat suitability maps, and identify those species  
291 that are most at risk from global pressures such as climate change (Walther et al., 2002).

292

## 293 **Conclusion**

294 In this study we have demonstrated that soundscapes can be used to predict species occurrence across a  
295 wide range of species in tropical forests. We found that the most accurate predictions could be made for  
296 common species with strong temporal occurrence patterns, including for species of specific

297 conservation concern. Using a comparison model, we found that soundscapes were able to predict  
298 occurrence more accurately than above-ground biomass, a widely used indicator of habitat quality  
299 across forest degradation gradients. Our findings indicate a promising new route for audio data to be  
300 used as an impactful conservation tool whilst side-stepping many of the scalability issues of existing  
301 approaches.

302

### 303 **Author's contributions**

304 S.S.S., R.M.E., N.S.J., and L.P. contributed to the conceptualisation, development of analysis methods  
305 and final implementation of this study. S.S.S., J.S., A.S., and N.Z collected the field data. S.S.S., R.M.E.,  
306 N.S.J., and L.P. led the manuscript writing process, with input provided from all authors.

307

### 308 **Acknowledgements**

309 Thanks to Sahil Loomba and Henry Bernard for their contributions to the study, and to the staff at the  
310 SAFE Project and SEARRP for logistical support in data collection. This project was supported by  
311 funding from WWF (Biome Health Project), Sime Darby Foundation (SAFE Project), NERC  
312 (NE/K007270/1, N.S.J.), and EPSRC (EP/R511547/1, S.S.S., EP/N014529/1, N.S.J.). Data was  
313 collected from Malaysia under an SaBC permit granted to S.S.S. (JKM/MBS.1000-2/2 JLD.8 (63)).

314

### 315 **Data availability**

316 Raw data from the point counts can be found at <https://doi.org/10.5281/zenodo.3265711> (Sethi et al.,  
317 2019). Processed audio and field data are stored at <https://zenodo.org/record/4048019#.X2x2Gu17kuU>,  
318 and code to reproduce results and figures is at  
319 [https://github.com/sarabsethi/sscape\\_spec\\_occ\\_preds\\_sethi2020](https://github.com/sarabsethi/sscape_spec_occ_preds_sethi2020).



## 320 References

- 321 Baillie, J., Hilton-Taylor, C., Stuart, S.N., Commission, I.S.S., 2004. 2004 IUCN Red List of  
322 Threatened Species: A Global Species Assessment. IUCN.
- 323 Baker, E., Price, B.W., Rycroft, S.D., Hill, J., Smith, V.S., 2015. BioAcoustica: a free and open  
324 repository and analysis platform for bioacoustics. Database 2015.  
325 <https://doi.org/10.1093/database/bav054>
- 326 Blei, D.M., Jordan, M.I., 2006. Variational inference for Dirichlet process mixtures. *Bayesian Anal.* 1,  
327 121–143. <https://doi.org/10.1214/06-BA104>
- 328 Brant, H.L., Ewers, R.M., Vythilingam, I., Drakeley, C., Benedick, S., Mumford, J.D., 2016. Vertical  
329 stratification of adult mosquitoes (Diptera: Culicidae) within a tropical rainforest in Sabah,  
330 Malaysia. *Malar. J.* 15, 370. <https://doi.org/10.1186/s12936-016-1416-1>
- 331 Brown, E., Dudley, N., Lindhe, A., Muhtaman, D., Stewart, C., Synnott, T., 2013. Common guidance  
332 for the identification of High Conservation Values. *HCV Resour. Netw.*
- 333 Clink, D.J., Crofoot, M.C., Marshall, A.J., 2019. Application of a semi-automated vocal fingerprinting  
334 approach to monitor Bornean gibbon females in an experimentally fragmented landscape in  
335 Sabah, Malaysia. *Bioacoustics* 28, 193–209. <https://doi.org/10.1080/09524622.2018.1426042>
- 336 Ewers, R.M., Didham, R.K., Fahrig, L., Ferraz, G., Hector, A., Holt, R.D., Kapos, V., Reynolds, G.,  
337 Sinun, W., Snaddon, J.L., Turner, E.C., 2011. A large-scale forest fragmentation experiment:  
338 The Stability of Altered Forest Ecosystems Project. *Philos. Trans. R. Soc. Lond. B Biol. Sci.*  
339 366, 3292–3302. <https://doi.org/10.1098/rstb.2011.0049>
- 340 GBIF Secretariat, 2020. GBIF backbone taxonomy. Checkl. Dataset Accessed March 2020.
- 341 Gemmeke, J.F., Ellis, D.P.W., Freedman, D., Jansen, A., Lawrence, W., Moore, R.C., Plakal, M.,  
342 Ritter, M., 2017. Audio Set: An ontology and human-labeled dataset for audio events [WWW  
343 Document]. Google AI. URL <https://ai.google/research/pubs/pub45857> (accessed 7.24.18).
- 344 Gibb, R., Browning, E., Glover-Kapfer, P., Jones, K.E., 2019. Emerging opportunities and challenges  
345 for passive acoustics in ecological assessment and monitoring. *Methods Ecol. Evol.* 10, 169–  
346 185. <https://doi.org/10.1111/2041-210X.13101>
- 347 Gijzen, H., 2013. Big data for a sustainable future. *Nature* 502, 38–38.  
348 <https://doi.org/10.1038/502038d>
- 349 Hershey, S., Chaudhuri, S., Ellis, D.P.W., Gemmeke, J.F., Jansen, A., Moore, R.C., Plakal, M., Platt,  
350 D., Saurous, R.A., Seybold, B., Slaney, M., Weiss, R.J., Wilson, K., 2017. CNN architectures  
351 for large-scale audio classification, in: 2017 IEEE International Conference on Acoustics,  
352 Speech and Signal Processing (ICASSP). Presented at the 2017 IEEE International Conference  
353 on Acoustics, Speech and Signal Processing (ICASSP), pp. 131–135.  
354 <https://doi.org/10.1109/ICASSP.2017.7952132>
- 355 Hill, A.P., Prince, P., Covarrubias, E.P., Doncaster, C.P., Snaddon, J.L., Rogers, A., 2018.  
356 AudioMoth: Evaluation of a smart open acoustic device for monitoring biodiversity and the  
357 environment. *Methods Ecol. Evol.* 9, 1199–1211. <https://doi.org/10.1111/2041-210X.12955>
- 358 Hirzel, A.H., Le Lay, G., Helfer, V., Randin, C., Guisan, A., 2006. Evaluating the ability of habitat  
359 suitability models to predict species presences. *Ecol. Model., Predicting Species Distributions*  
360 199, 142–152. <https://doi.org/10.1016/j.ecolmodel.2006.05.017>
- 361 Inger, R.F., Voris, H.K., 1988. Taxonomic Status and Reproductive Biology of Bornean  
362 Tadpolecarrying Frogs. *Copeia* 1988, 1060–1061. <https://doi.org/10.2307/1445733>
- 363 Lambin, E.F., Meyfroidt, P., 2011. Global land use change, economic globalization, and the looming  
364 land scarcity. *Proc. Natl. Acad. Sci. U. S. A.* 108, 3465–3472.  
365 <https://doi.org/10.1073/pnas.1100480108>

- 366 Lefsky, M.A., Cohen, W.B., Harding, D.J., Parker, G.G., Acker, S.A., Gower, S.T., 2002. Lidar  
367 remote sensing of above-ground biomass in three biomes. *Glob. Ecol. Biogeogr.* 11, 393–399.  
368 <https://doi.org/10.1046/j.1466-822x.2002.00303.x>
- 369 Leupen, B.T., Krishnasamy, K., Shepherd, C.R., Chng, S.C., Bergin, D., Eaton, J.A., Yukin, D.A.,  
370 Hue, S.K.P., Miller, A., NEKARIS, K.A.-I., others, 2018. Trade in White-rumped Shamas  
371 *Kittacincla malabarica* demands strong national and international responses. *Forktail J. Asian*  
372 *Ornithol.* 34, 1–8.
- 373 Luke, S.H., Dow, R.A., Butler, S., Khen, C.V., Aldridge, D.C., Foster, W.A., Turner, E.C., 2017. The  
374 impacts of habitat disturbance on adult and larval dragonflies (Odonata) in rainforest streams  
375 in Sabah, Malaysian Borneo. *Freshw. Biol.* 62, 491–506. <https://doi.org/10.1111/fwb.12880>
- 376 Mills, L.S., Soulé, M.E., Doak, D.F., 1993. The Keystone-Species Concept in Ecology and  
377 Conservation: Management and policy must explicitly consider the complexity of interactions  
378 in natural systems. *BioScience* 43, 219–224. <https://doi.org/10.2307/1312122>
- 379 Newbold, T., Hudson, L.N., Hill, S.L.L., Contu, S., Lysenko, I., Senior, R.A., Börger, L., Bennett,  
380 D.J., Choimes, A., Collen, B., Day, J., De Palma, A., Díaz, S., Echeverria-Londoño, S., Edgar,  
381 M.J., Feldman, A., Garon, M., Harrison, M.L.K., Alhousseini, T., Ingram, D.J., Itescu, Y.,  
382 Kattge, J., Kemp, V., Kirkpatrick, L., Kleyer, M., Correia, D.L.P., Martin, C.D., Meiri, S.,  
383 Novosolov, M., Pan, Y., Phillips, H.R.P., Purves, D.W., Robinson, A., Simpson, J., Tuck, S.L.,  
384 Weiher, E., White, H.J., Ewers, R.M., Mace, G.M., Scharlemann, J.P.W., Purvis, A., 2015.  
385 Global effects of land use on local terrestrial biodiversity. *Nature* 520, 45–50.  
386 <https://doi.org/10.1038/nature14324>
- 387 Pfeifer, M., Lefebvre, V., Turner, E., Cusack, J., Khoo, M., Chey, V.K., Maria Peni, Ewers, R.M.,  
388 2015. Deadwood biomass: an underestimated carbon stock in degraded tropical forests?  
389 *Environ. Res. Lett.* 10, 044019. <https://doi.org/10.1088/1748-9326/10/4/044019>
- 390 Pieretti, N., Farina, A., Morri, D., 2011. A new methodology to infer the singing activity of an avian  
391 community: The Acoustic Complexity Index (ACI). *Ecol. Indic.* 11, 868–873.  
392 <https://doi.org/10.1016/j.ecolind.2010.11.005>
- 393 Pijanowski, B.C., Villanueva-Rivera, L.J., Dumyahn, S.L., Farina, A., Krause, B.L., Napoletano,  
394 B.M., Gage, S.H., Pieretti, N., 2011. Soundscape ecology: The science of sound in the  
395 landscape. *BioScience* 61, 203–216. <https://doi.org/10.1525/bio.2011.61.3.6>
- 396 Popescu, S.C., Zhao, K., Neuenschwander, A., Lin, C., 2011. Satellite lidar vs. small footprint  
397 airborne lidar: Comparing the accuracy of aboveground biomass estimates and forest structure  
398 metrics at footprint level. *Remote Sens. Environ., DESDynI VEG-3D Special Issue* 115,  
399 2786–2797. <https://doi.org/10.1016/j.rse.2011.01.026>
- 400 Riutta, T., Malhi, Y., Kho, L.K., Marthews, T.R., Huasco, W.H., Khoo, M., Tan, S., Turner, E.,  
401 Reynolds, G., Both, S., Burslem, D.F.R.P., Teh, Y.A., Vairappan, C.S., Majalap, N., Ewers,  
402 R.M., 2018. Logging disturbance shifts net primary productivity and its allocation in Bornean  
403 tropical forests. *Glob. Change Biol.* 24, 2913–2928. <https://doi.org/10.1111/gcb.14068>
- 404 Sethi, S.S., Ewers, R.M., Jones, N., Picinali, L., Orme, D., Sleutel, J., Shabrani, A., Zulkifli, N.,  
405 Bernard, H., 2019. Avifaunal and Herpetofaunal point counts with recorded acoustic data  
406 (dataset). <https://doi.org/10.5281/zenodo.3265712>
- 407 Sethi, S.S., Ewers, R.M., Jones, N.S., Orme, C.D.L., Picinali, L., 2018. Robust, real-time and  
408 autonomous monitoring of ecosystems with an open, low-cost, networked device. *Methods*  
409 *Ecol. Evol.* 9, 2383–2387. <https://doi.org/10.1111/2041-210X.13089>
- 410 Sethi, S.S., Ewers, R.M., Jones, N.S., Signorelli, A., Picinali, L., Orme, C.D.L., 2020a. SAFE  
411 Acoustics: An open-source, real-time eco-acoustic monitoring network in the tropical  
412 rainforests of Borneo. *Methods Ecol. Evol.*
- 413 Sethi, S.S., Jones, N.S., Fulcher, B.D., Picinali, L., Clink, D.J., Klinck, H., Orme, C.D.L., Wrege,  
414 P.H., Ewers, R.M., 2020b. Characterizing soundscapes across diverse ecosystems using a



- 415 universal acoustic feature set. *Proc. Natl. Acad. Sci.* 117, 17049–17055.  
416 <https://doi.org/10.1073/pnas.2004702117>
- 417 Stowell, D., Petrusková, T., Šálek, M., Linhart, P., 2018. Automatic acoustic identification of  
418 individual animals: Improving generalisation across species and recording conditions.  
419 ArXiv181009273 Cs Eess.
- 420 Stowell, D., Wood, M., Stylianou, Y., Glotin, H., 2016. Bird detection in audio: A survey and a  
421 challenge. ArXiv160803417 Cs.
- 422 Sueur, J., Pavoine, S., Hamerlynck, O., Duvail, S., 2008. Rapid acoustic survey for biodiversity  
423 appraisal. *PLOS ONE* 3, e4065. <https://doi.org/10.1371/journal.pone.0004065>
- 424 Walther, G.-R., Post, E., Convey, P., Menzel, A., Parmesan, C., Beebee, T.J.C., Fromentin, J.-M.,  
425 Hoegh-Guldberg, O., Bairlein, F., 2002. Ecological responses to recent climate change. *Nature*  
426 416, 389–395. <https://doi.org/10.1038/416389a>
- 427 Wrege, P.H., Rowland, E.D., Keen, S., Shiu, Y., 2017. Acoustic monitoring for conservation in  
428 tropical forests: examples from forest elephants. *Methods Ecol. Evol.* n/a-n/a.  
429 <https://doi.org/10.1111/2041-210X.12730>  
430

431

## **Supplementary Information**

| <b>Species common name</b>          | <b>Latin binomial</b>              | <b>Red List status</b> | <b>N occurrences</b> |
|-------------------------------------|------------------------------------|------------------------|----------------------|
| Cricket Frog                        | <i>Hylarana nicobariensis</i>      | LC                     | 121                  |
| Four-lined Tree Frog                | <i>Polypedates leucomystax</i>     | LC                     | 75                   |
| Grass Frog                          | <i>Fejervarya limnocharis</i>      | LC                     | 63                   |
| House Gecko                         | <i>Hemidactylus frenatus</i>       | LC                     | 117                  |
| Rough Guardian Frog                 | <i>Limnonectes finchi</i>          | LC                     | 78                   |
| Smith's Giant Gecko                 | <i>Gekko smithii</i>               | LC                     | 71                   |
| Tree Hole Frog                      | <i>Metaphrynella sundana</i>       | LC                     | 211                  |
| Ashy Tailorbird                     | <i>Orthotomus ruficeps</i>         | LC                     | 143                  |
| Asian Red-eyed Bulbul               | <i>Pycnonotus brunneus</i>         | LC                     | 62                   |
| Black-and-yellow Broadbill          | <i>Eurylaimus ochromalus</i>       | NT                     | 63                   |
| Black-headed Bulbul                 | <i>Pycnonotus atriceps</i>         | LC                     | 126                  |
| Black-naped Monarch                 | <i>Hypothymis azurea</i>           | LC                     | 53                   |
| Blue-eared Barbet                   | <i>Psilopogon duvaucelii</i>       | LC                     | 82                   |
| Bold-striped Tit-babbler            | <i>Macronus bornensis</i>          | LC                     | 269                  |
| Chestnut-backed Scimitar Babbler    | <i>Pomatorhinus montanus</i>       | LC                     | 66                   |
| Chestnut-winged Babbler             | <i>Cyanoderma erythropterum</i>    | LC                     | 182                  |
| Common Emerald Dove                 | <i>Chalcophaps indica</i>          | LC                     | 55                   |
| Dark-necked Tailorbird              | <i>Orthotomus atrogularis</i>      | LC                     | 68                   |
| Fluffy-backed Tit-babbler           | <i>Macronus ptilosus</i>           | NT                     | 134                  |
| Great Argus                         | <i>Argusianus argus</i>            | NT                     | 90                   |
| Greater Coucal                      | <i>Centropus sinensis</i>          | LC                     | 139                  |
| Lesser Coucal                       | <i>Centropus bengalensis</i>       | LC                     | 74                   |
| Little Spiderhunter                 | <i>Arachnothera longirostra</i>    | LC                     | 170                  |
| Malaysian Pied Fantail              | <i>Rhipidura javanica</i>          | LC                     | 119                  |
| Plaintive Cuckoo                    | <i>Cacomantis merulinus</i>        | LC                     | 94                   |
| Rufous-tailed Tailorbird            | <i>Orthotomus sericeus</i>         | LC                     | 164                  |
| Short-tailed Babbler                | <i>Pellorneum malaccense</i>       | NT                     | 69                   |
| Slender-billed Crow                 | <i>Corvus enca</i>                 | LC                     | 113                  |
| Sooty-capped Babbler                | <i>Malacopteron affine</i>         | NT                     | 55                   |
| Spectacled Bulbul                   | <i>Pycnonotus erythrophthalmos</i> | LC                     | 158                  |
| White-crowned Shama                 | <i>Copsychus stricklandii</i>      | LC                     | 106                  |
| Yellow-bellied Prinia               | <i>Prinia flaviventris</i>         | LC                     | 179                  |
| Yellow-rumped Flowerpecker          | <i>Prionochilus xanthopygius</i>   | LC                     | 56                   |
| Yellow-vented Bulbul                | <i>Pycnonotus goiavier</i>         | LC                     | 143                  |
| <b>Black Hornbill</b>               | <i>Anthracoceros malayanus</i>     | <b>VU</b>              | <b>15</b>            |
| <b>Chestnut-necklaced Partridge</b> | <i>Arborophila charltonii</i>      | <b>VU</b>              | <b>21</b>            |

|                     |                             |    |    |
|---------------------|-----------------------------|----|----|
| Helmeted Hornbill   | <i>Rhinoplax vigil</i>      | CR | 16 |
| Rhinoceros Hornbill | <i>Buceros rhinoceros</i>   | VU | 34 |
| Short-toed Coucal   | <i>Centropus rectunguis</i> | VU | 23 |

433

434 **Table S1: We surveyed 39 species across two taxonomic groups. Here we provide common names,**  
 435 **Latin binomials, IUCN Red List status, and total number of occurrences across all point counts for each**  
 436 **species we consider in this study. Red List acronyms are as follows: LC = least concern, NT = near**  
 437 **threatened, VU = vulnerable, CR = critically endangered. We defined threatened species to be in either**  
 438 **VU or CR categories. Non-threatened herpetofaunal species are in green, non-threatened avifaunal**  
 439 **species in blue, and threatened avifaunal species are in brown.**

440

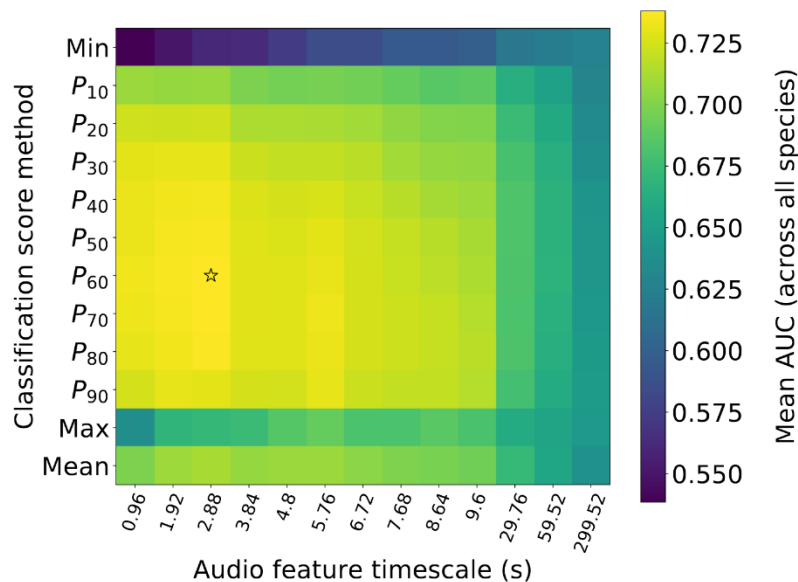

441 **Figure S2: A grid search reveals the optimal parameters for classification using soundscape features.**  
 442 **We performed a grid search across acoustic feature timescales and method of deriving classification**  
 443 **confidence,  $\lambda$ . For each combination, we calculated mean AUC of classifications across all 39 species.**  
 444 **We found acoustic features on the 2.88s timescale with the P<sub>60</sub> (60<sup>th</sup> percentile) metric provided the**  
 445 **most accurate classifications.**

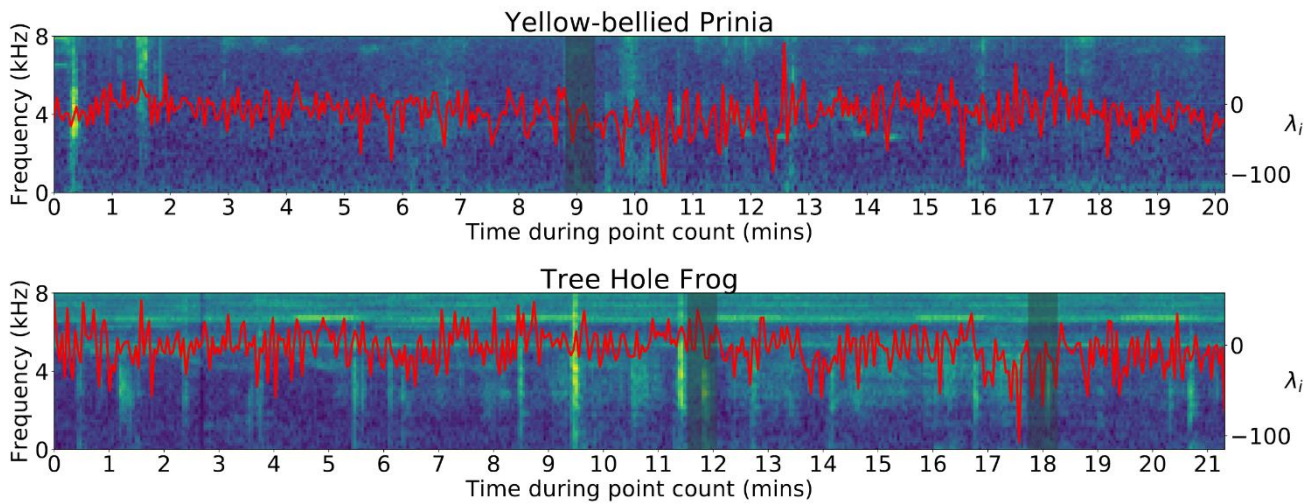

446

447 **Figure S3: Classifications are not based on species vocalisations.** We visualise per feature  
448 classification confidence ( $\lambda_i$ , red) together with a spectrogram of the audio data from one point count  
449 each for the Yellow-bellied Prinia and Tree Hole Frog. Shaded are regions during which each of the  
450 species is vocalising. Classification confidence does not increase significantly during these periods,  
451 indicating that predictions of occurrence are not based on exact species vocalisations, but other  
452 components of the overall soundscape that indicate species presence.

453

454

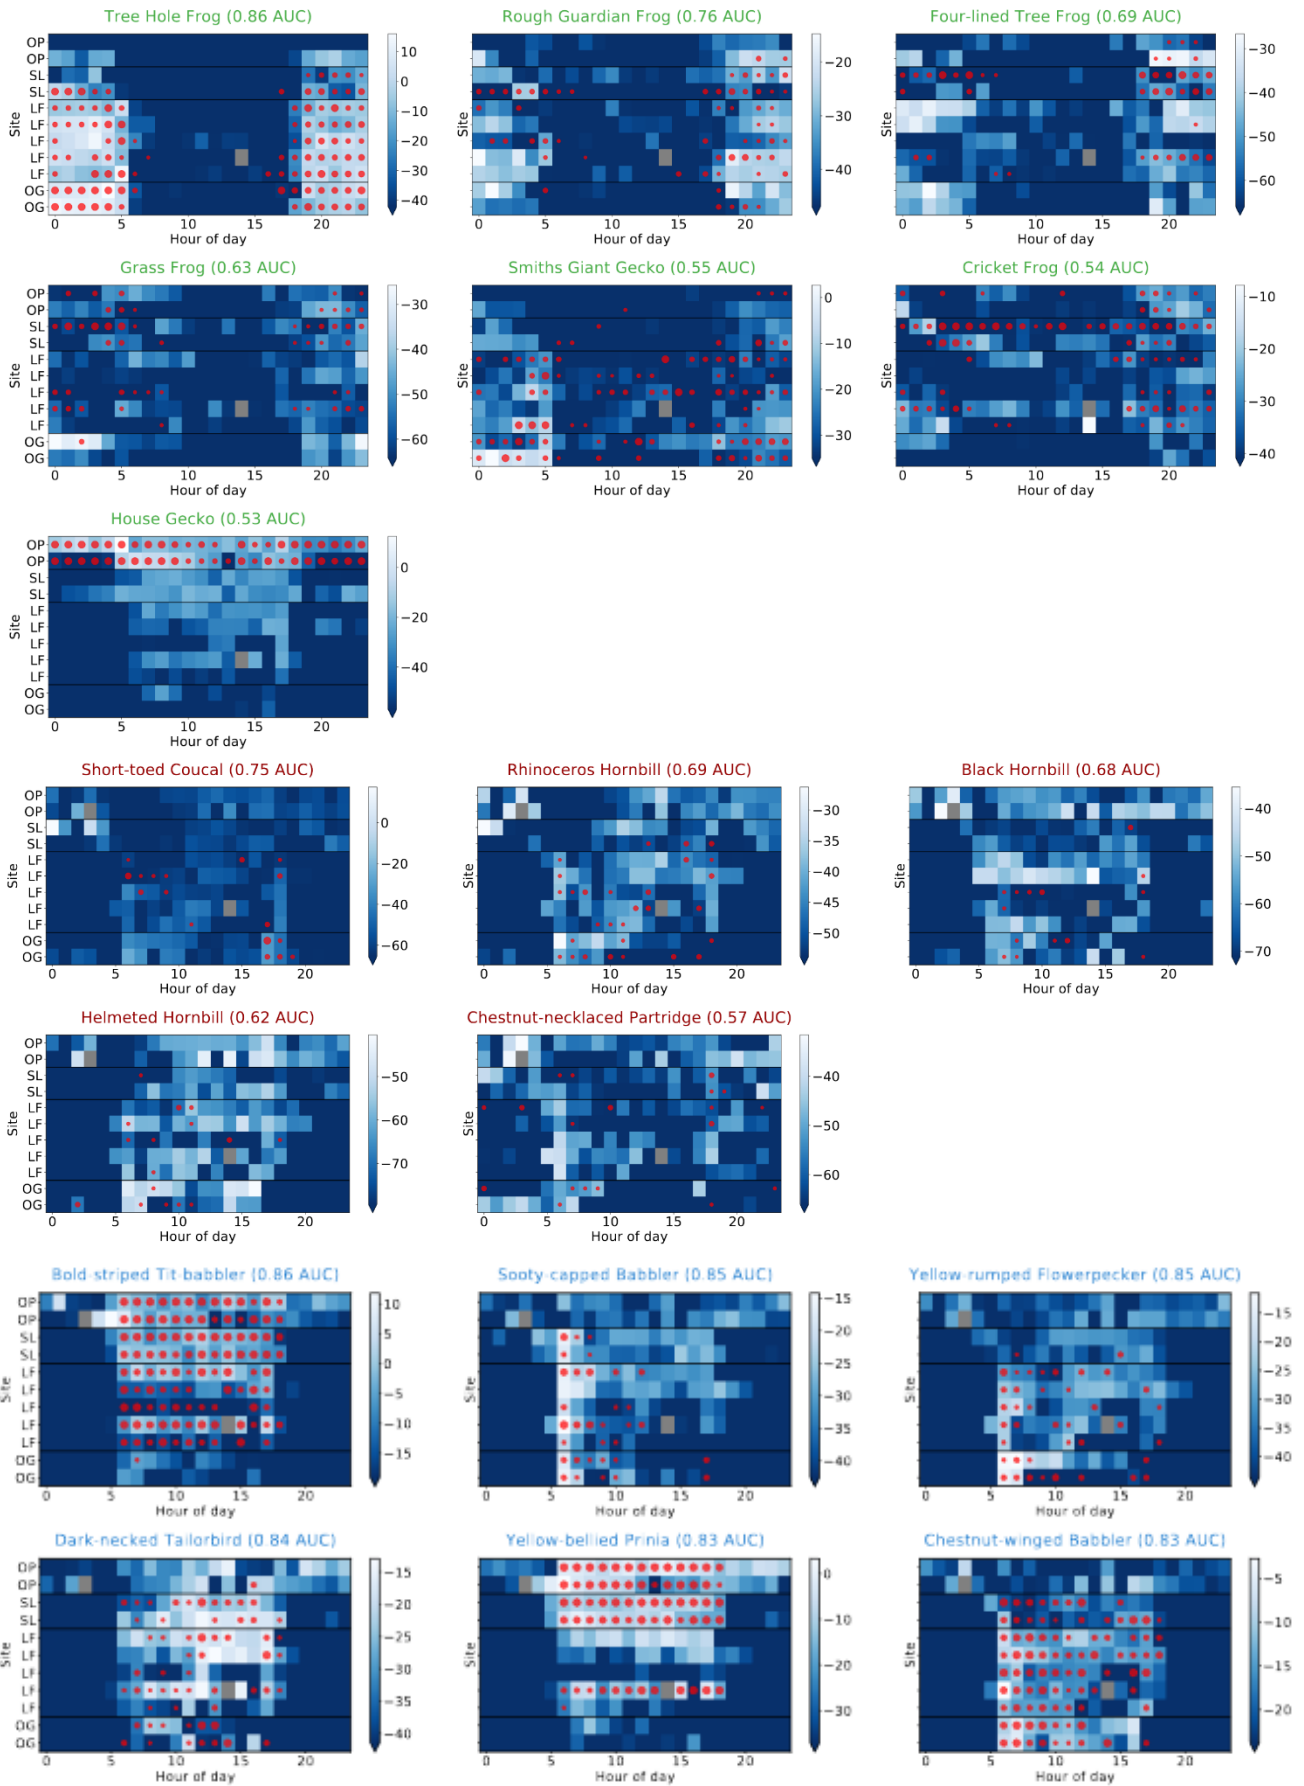

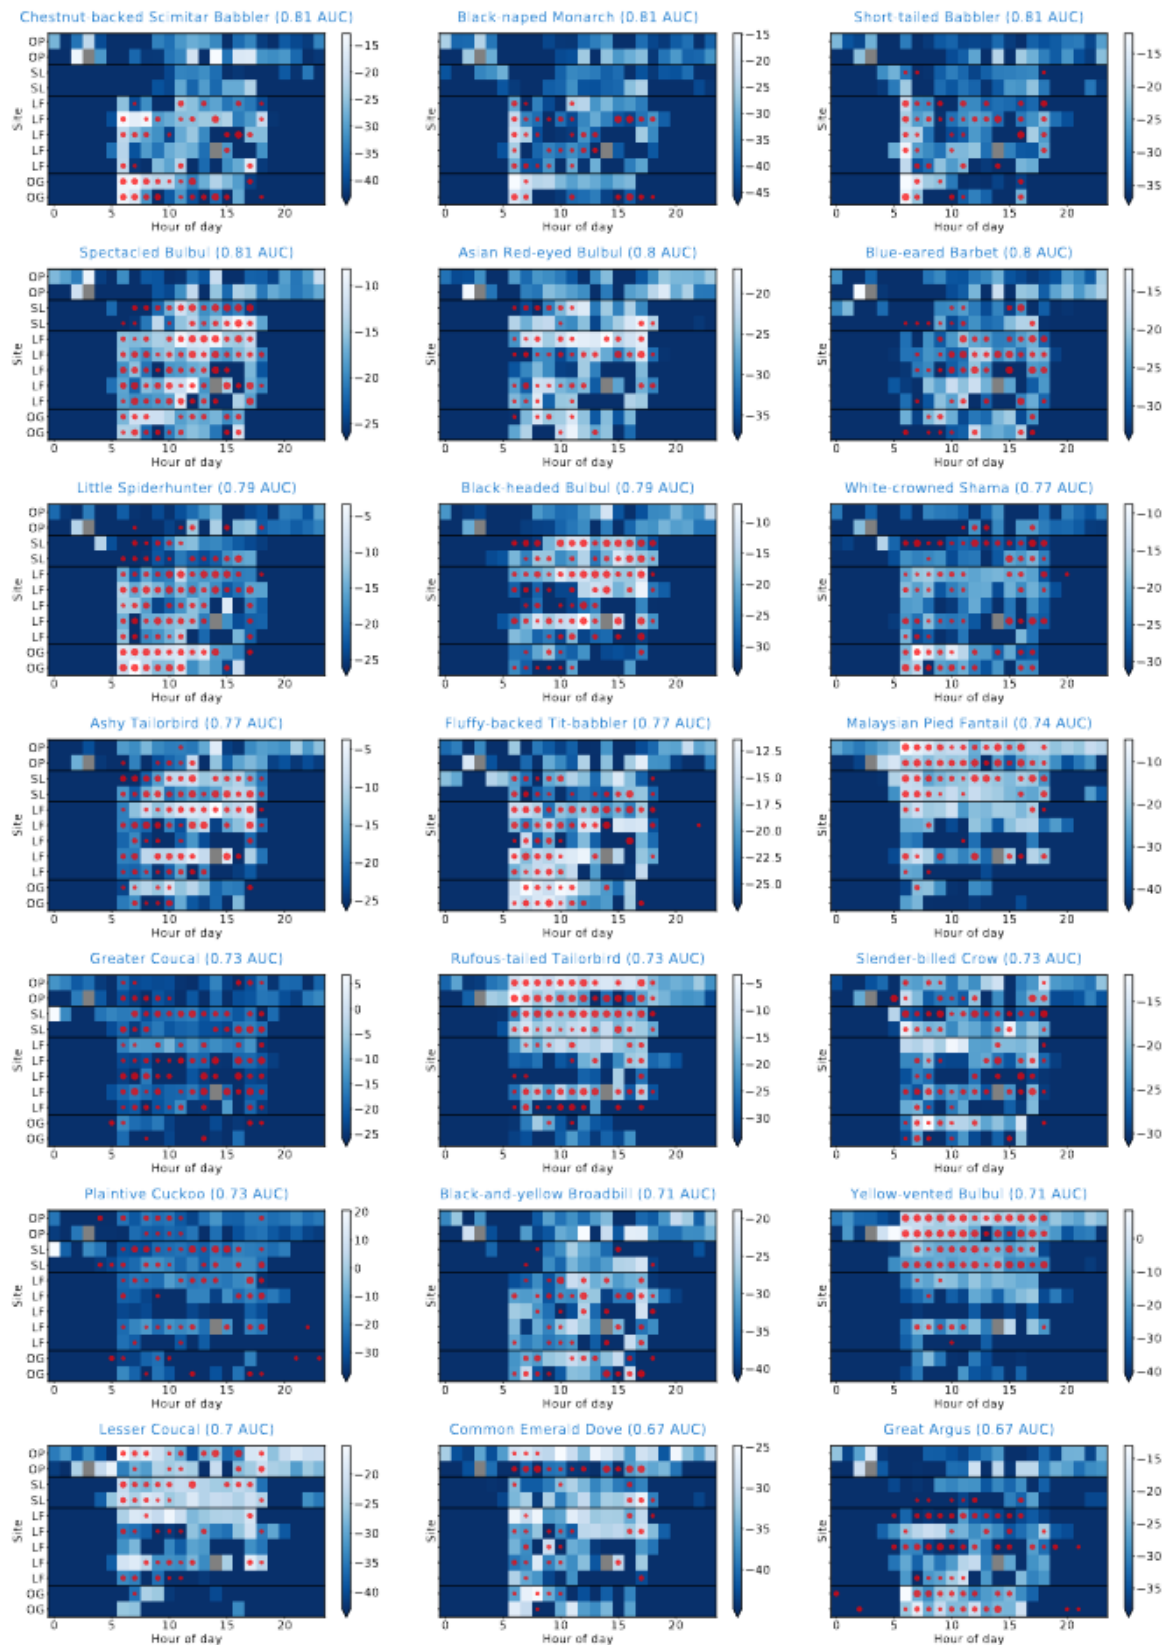

456 **Figure S4: Classification confidence from soundscape data reflects true occurrence data for many**  
457 **species. Median classification scores,  $\lambda$ , from blue (low) to white (high) are shown for occurrence**  
458 **predictions from soundscapes for all 39 species tested. Overlaid in red is true occurrence data, where**  
459 **circle sizes indicate regularity with which the species was found at that site and hour.**
